# Supplementary material
Source: publisher figshare collection journal article supplement (https://acs.figshare.com/ndownloader/files/13194518)
Supplement: Supplementary file 1 [file 13194518]

## Supporting Information

### Controlling the Morphology of Au-Pd Heterodimer Nanoparticles by Surface Ligands

Martin Kluecker<sup>1</sup>, Bethany M. Connolly<sup>1,2</sup>, David M. Marolf<sup>1,3</sup>, Muhammad Nawaz Tahir<sup>4\*</sup>, Karsten Korschelt<sup>1</sup>, Paul Simon<sup>5</sup>, Uta Köhler<sup>5</sup>, Sergi Plana-Ruiz<sup>1,6,7</sup>, Bastian Barton<sup>1,8</sup>, Martin Panthöfer<sup>1</sup>, Ute Kolb<sup>1,7</sup> and Wolfgang Tremel<sup>1\*</sup>

<sup>1</sup>Institut für Anorganische Chemie und Analytische Chemie, Johannes Gutenberg-Universität, Duesbergweg 10-14, 55128 Mainz, Germany

<sup>2</sup>Department of Chemistry, University of Cambridge, Lensfield Road, Cambridge, CB2 1EW, United Kingdom

<sup>3</sup>Department of Chemistry, Rice University, Houston, Texas 77005, United States of America

<sup>4</sup>Department of Chemistry, King Fahd University of Petroleum and Minerals, Dhahran 31261, P.O. Box 5048, Kingdom of Saudi Arabia

<sup>5</sup>Max-Planck-Institut für Chemische Physik fester Stoffe, Nöthnitzer Straße 40, 01187 Dresden, Germany

<sup>6</sup>LENS, MIND/IN2UB, Electronics and Biomedical Engineering, Faculty of Physics, University of Barcelona, Martí i Franquès, 1-11, 08028 Barcelona, Catalonia, Spain

<sup>7</sup>Institut für Angewandte Geowissenschaften, Technische Universität Darmstadt, Schnittspahnstraße 9, 64287 Darmstadt, Germany

<sup>8</sup>Fraunhofer-Institute for Structural Durability and System Reliability LBF, Division Plastics, Schlossgartenstraße 6, 64289 Darmstadt, Germany

\*Correspondence should be addressed to: [tremel@uni-mainz.de](mailto:tremel@uni-mainz.de), [muhammad.tahir@kfupm.edu.sa](mailto:muhammad.tahir@kfupm.edu.sa)

#### Content:

- **Figure S1:** Size distribution histograms of OAm and ODT surface functionalized Au and Pd NPs.
- **Figure S2:** EDX of the reaction of 4 nm ODT-Au NPs with Pd(ac)<sub>2</sub> to form Au-Pd heterodimers.
- **Figure S3:** EDX of the reaction of 9-11 nm OAm-Au NPs with Pd(ac)<sub>2</sub> to form Au-Pd heterodimers.
- **Figure S4:** EDX of ODT-Au@Pd NPs.
- **Figure S5:** TEM images of ODT-Au@Pd NPs quenching studies.
- **Figure S6:** (HR)-TEM images of ODT-Au@Pd NPs with a Au:Pd ratio of 3:1.
- **Figure S7:** (HR)-TEM images of ODT-Au@Pd NPs with a Au:Pd ratio of 1:3.
- **Figure S8:** HAADF-STEM and HR-TEM images of OAm-Pd@Au NPs.
- **Figure S9:** Rietveld refinement of powder XRD.
- **Figure S10:** HR-TEM image of ODT-Pd@Au NPs.
- **Figure S11:** UV-vis spectra.

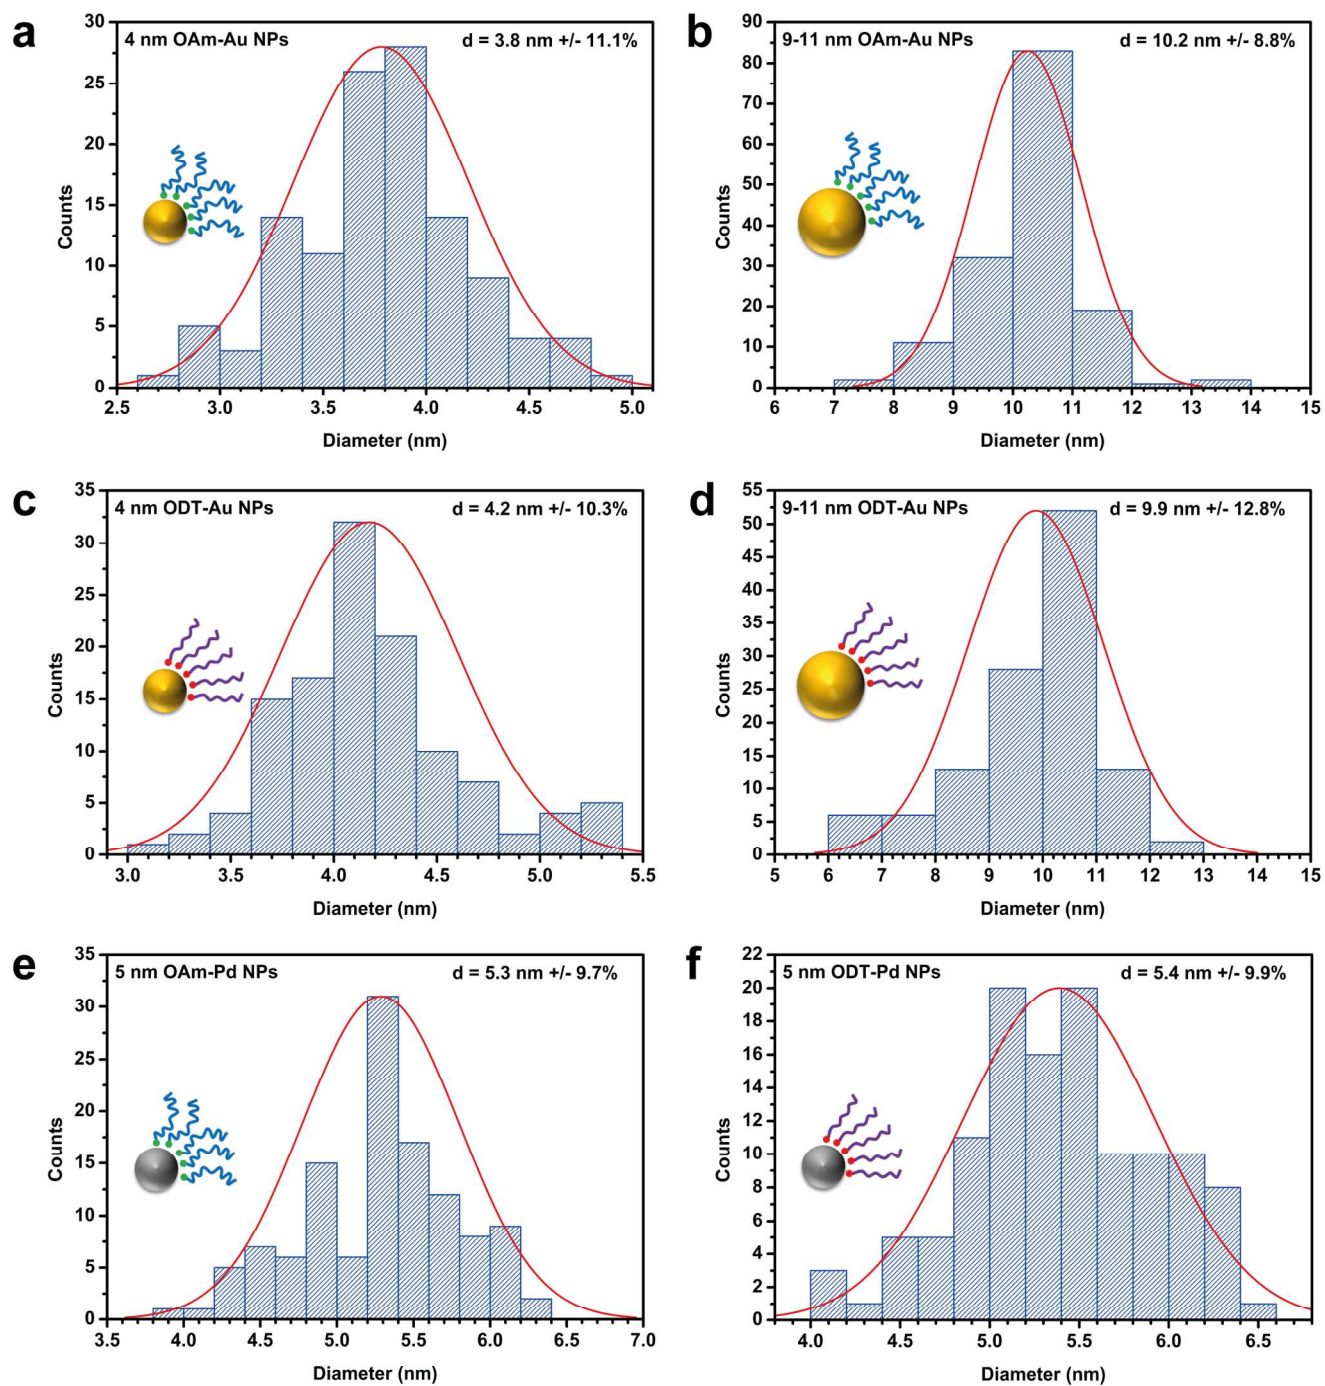

**Figure S1.** Size distribution histograms of OAm and ODT surface functionalized Au and Pd NPs.

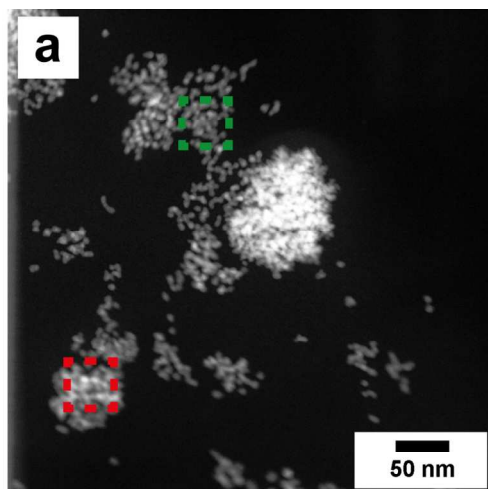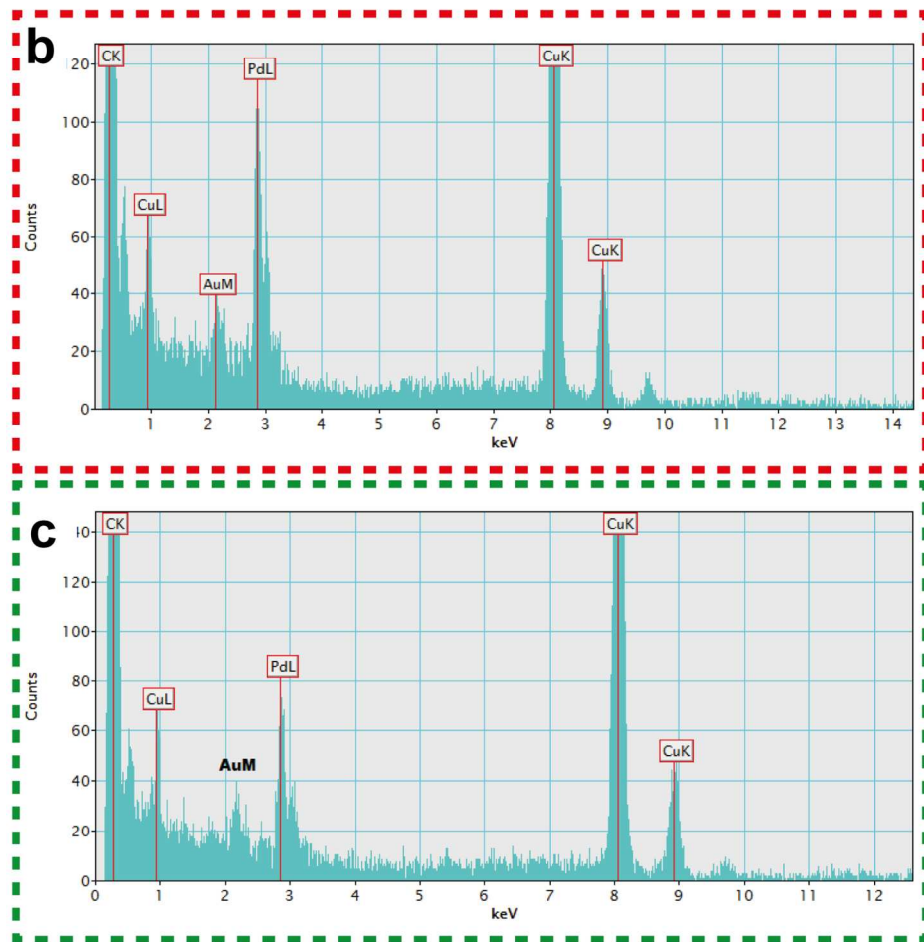

**Figure S2.** (a) ADF-STEM image of the reaction of 4 nm ODT-Au NPs with  $\text{Pd}(\text{ac})_2$  to form Au-Pd heterodimers. (b) EDX spectrum of the red boxed region from (a). (c) EDX spectrum of the green boxed region from (a).

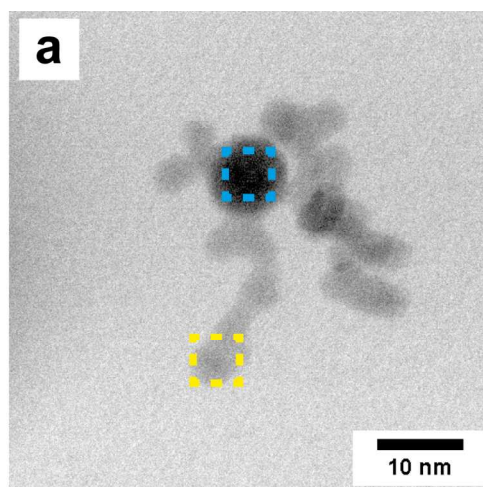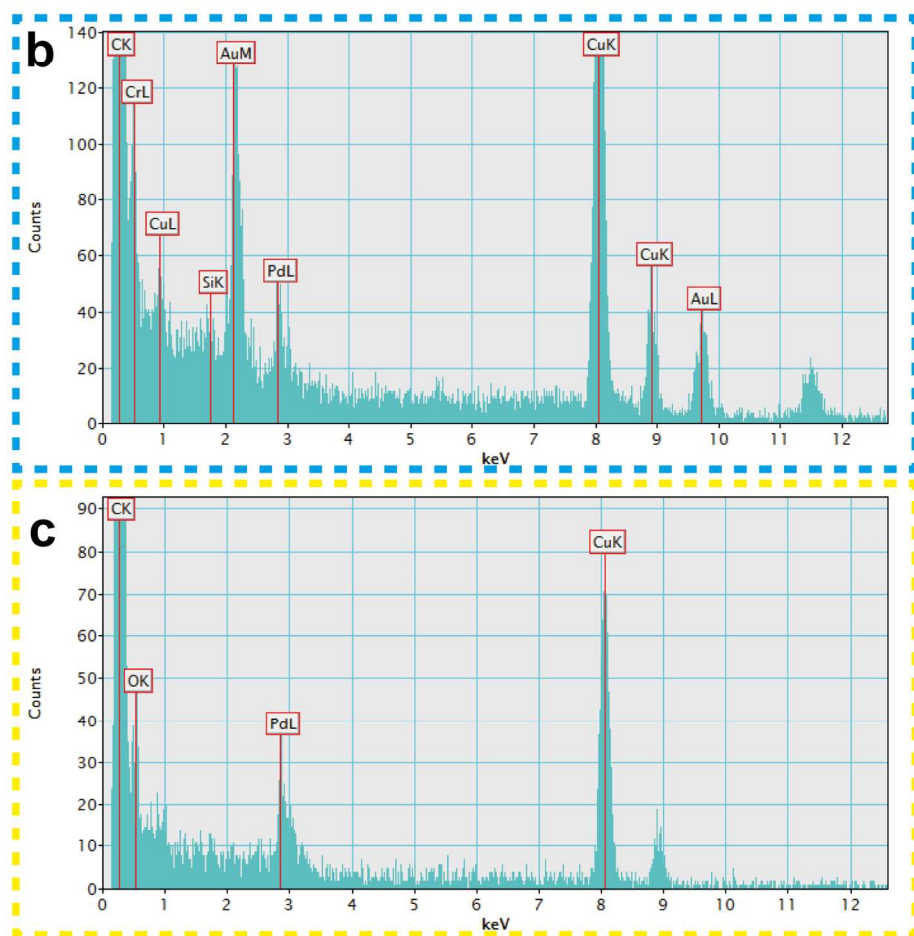

**Figure S3.** Bright-Field (BF)-STEM image of the reaction of 9-11 nm OAm-Au NPs with  $\text{Pd}(\text{ac})_2$  to form Au-Pd heterodimers. (b) EDX spectrum of the blue boxed region from (a) showing the Au content of the NP core. (c) EDX spectrum of the yellow boxed region from (a) showing the Pd content of the NP “blades”. EDX spectra were acquired in ADF-STEM mode (see also Figure 2f).

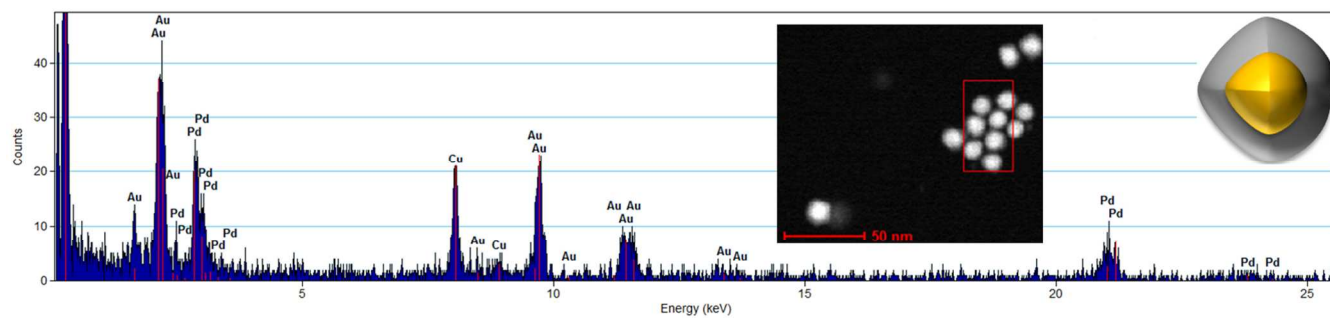

**Figure S4.** STEM image along with EDX spectrum of boxed ODT-Au@Pd NPs.



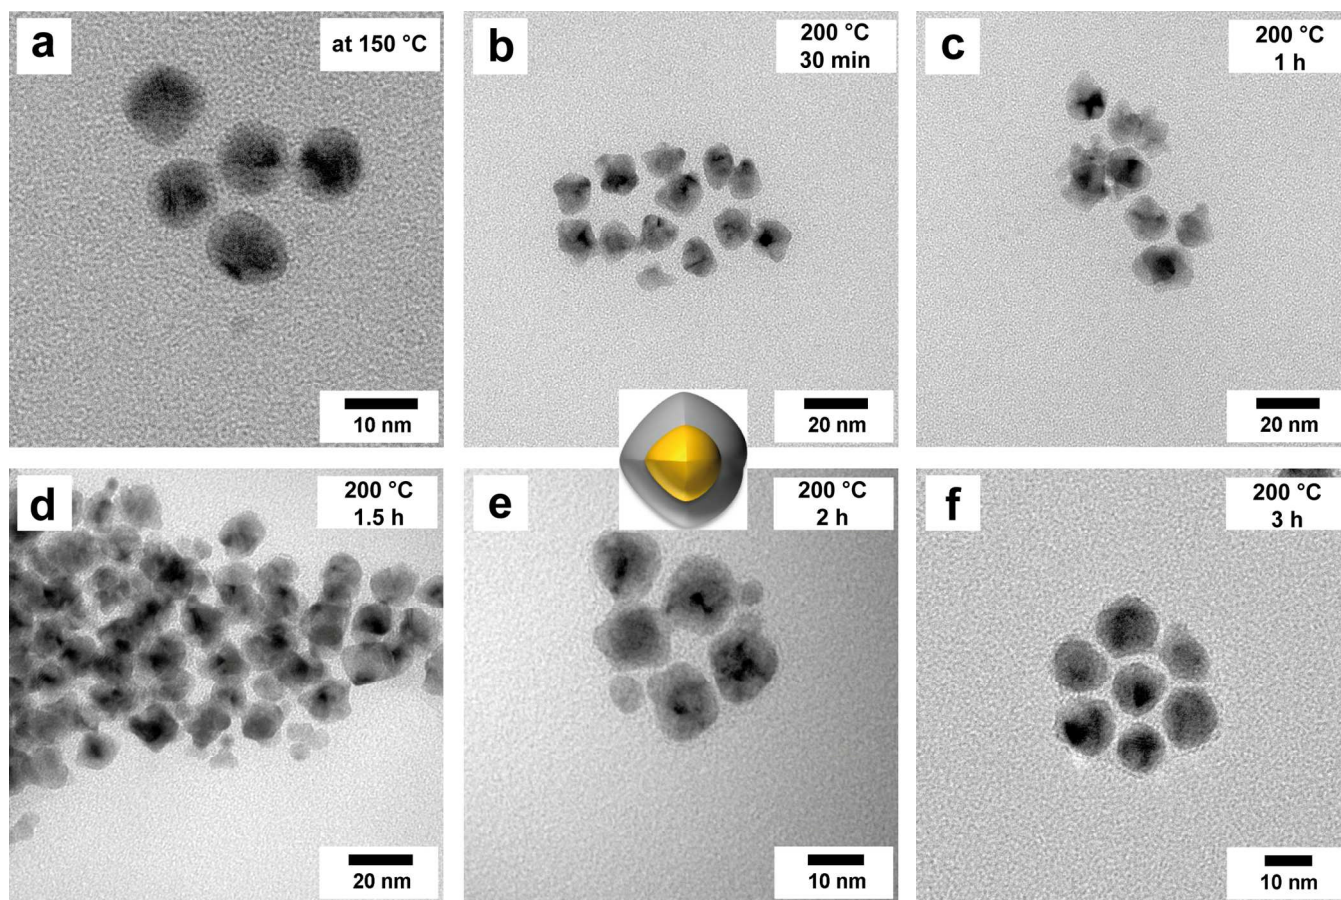

**Figure S5.** TEM images of ODT-Au@Pd NPs quenching studies at different reaction times and temperatures.

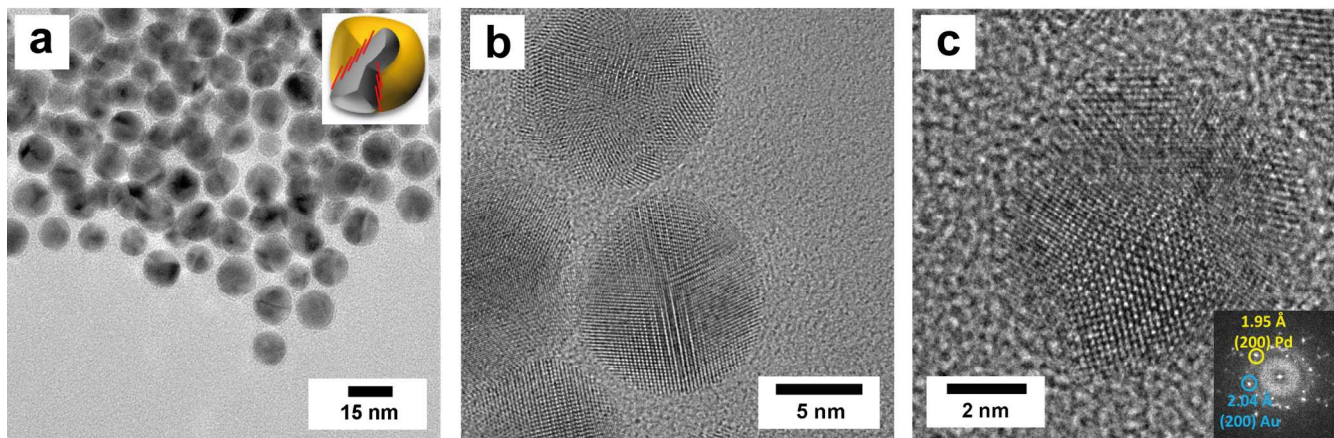

**Figure S6.** (a) TEM image of ODT-Au@Pd NPs with a Au:Pd ratio of 3:1. (b, c) Aberration corrected HR-TEM images of NPs from (a) with Au and Pd reflexes marked in FFT (insert in c).

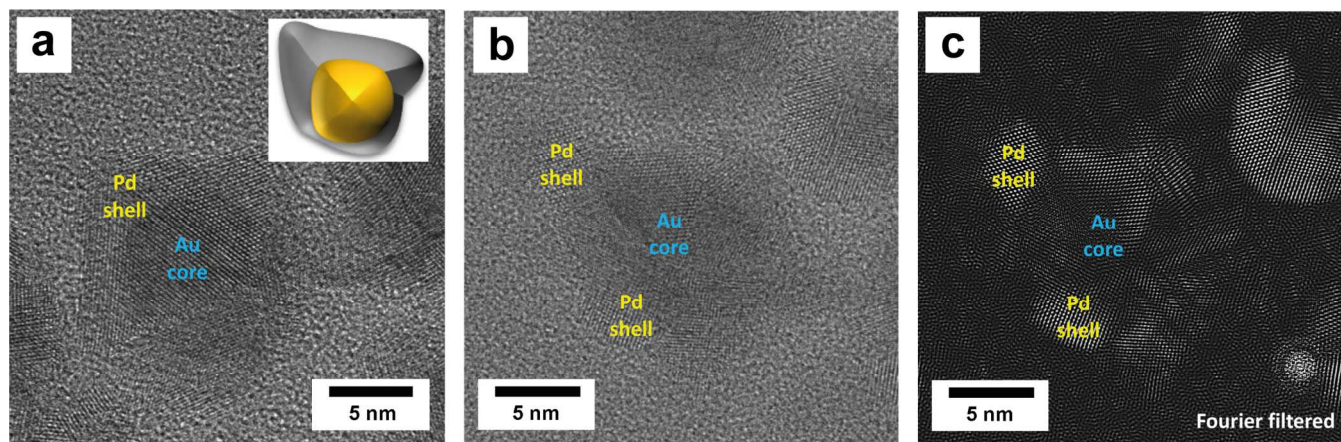

**Figure S7.** (a, b) Aberration corrected HR-TEM images of ODT-Au@Pd NPs with a Au:Pd ratio of 1:3 showing Au core and Pd shell. (c) Fourier filtered image of (b) showing accretions of Pd in the Pd shell structure.



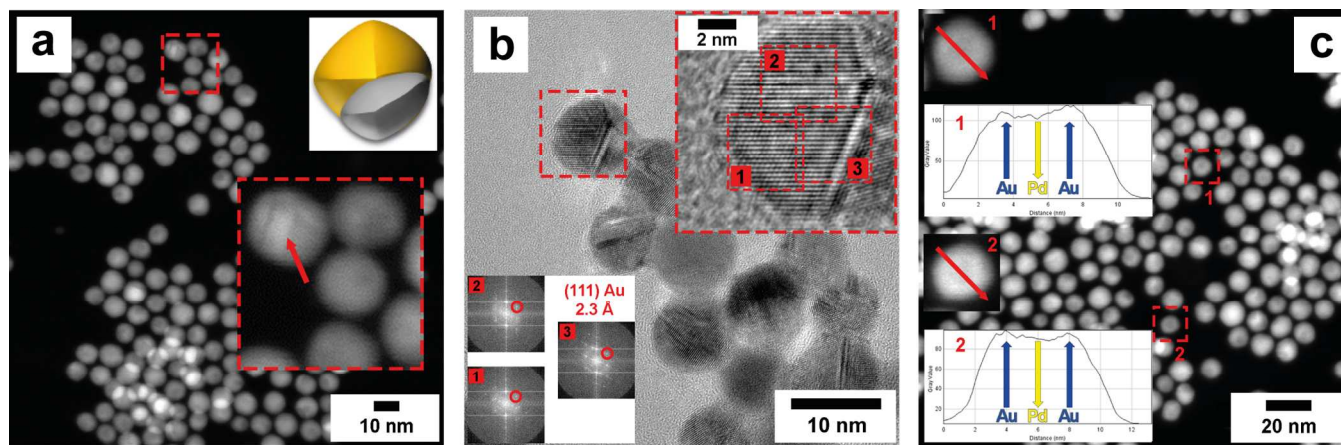

**Figure S8.** (a) HAADF-STEM image and (b) HR-TEM image of OAm-Pd@Au NPs showing domain boundaries of Au rich domains. (c) HAADF-STEM image and grey value profile for two OAm-Pd@Au NPs showing core-shell structure.

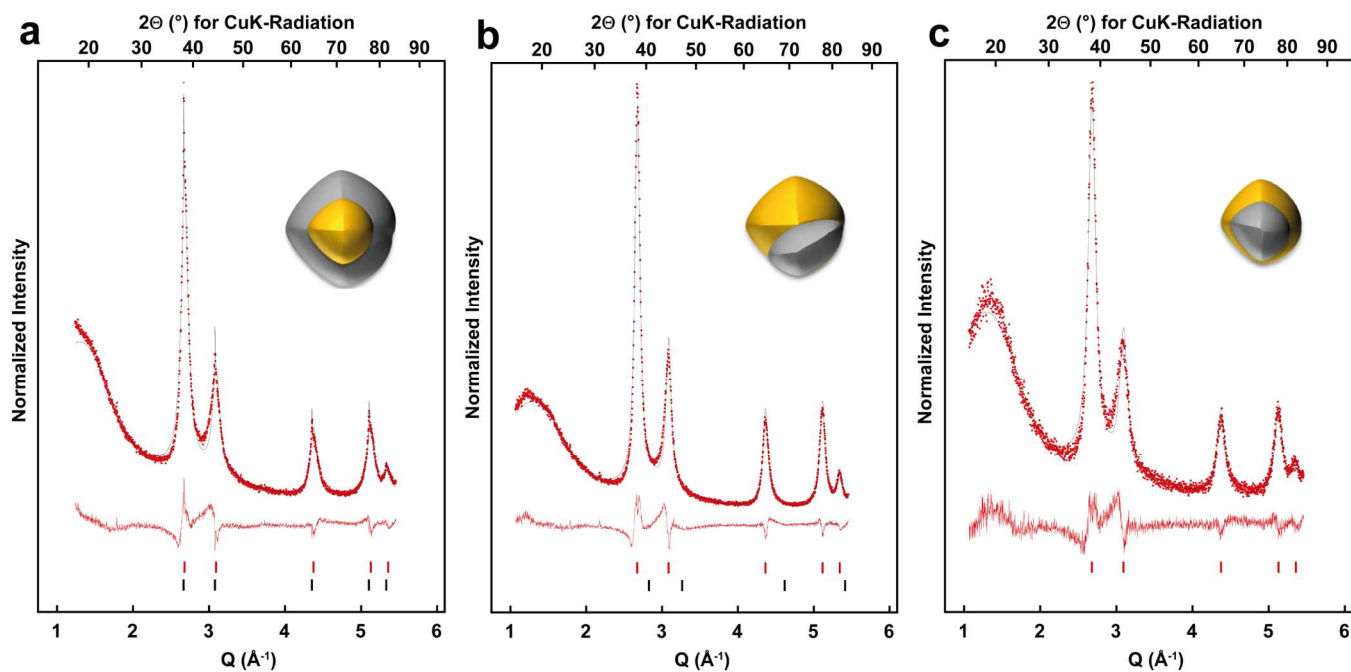

**Figure S9.** Refinements of powder XRD data for (a) ODT-Au@Pd NPs, (b) OAm-Pd@Au NPs, and (c) ODT-Pd@Au NPs. Red dots mark the experimental data, the black line corresponds to the calculated pattern, and the red line shows the difference between the experimental and calculated data. Red and black ticks mark reflections of Au and Pd, respectively.  $Q = [4\pi \sin(\Theta)]/\lambda$  is the scattering vector.

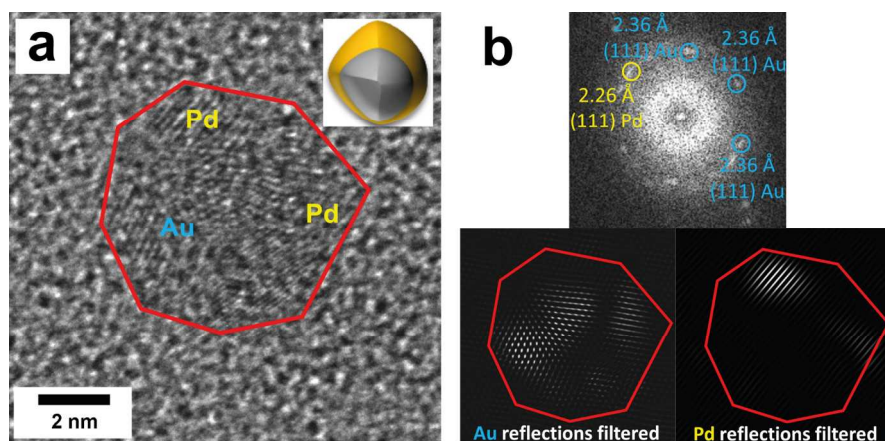

**Figure S10.** (a) Aberration corrected HR-TEM image of a ODT-Pd@Au NP with distribution of Au and Pd. (b) FFT showing Au and Pd reflections of the NP displayed in (a) along with filtered Au and Pd reflections.

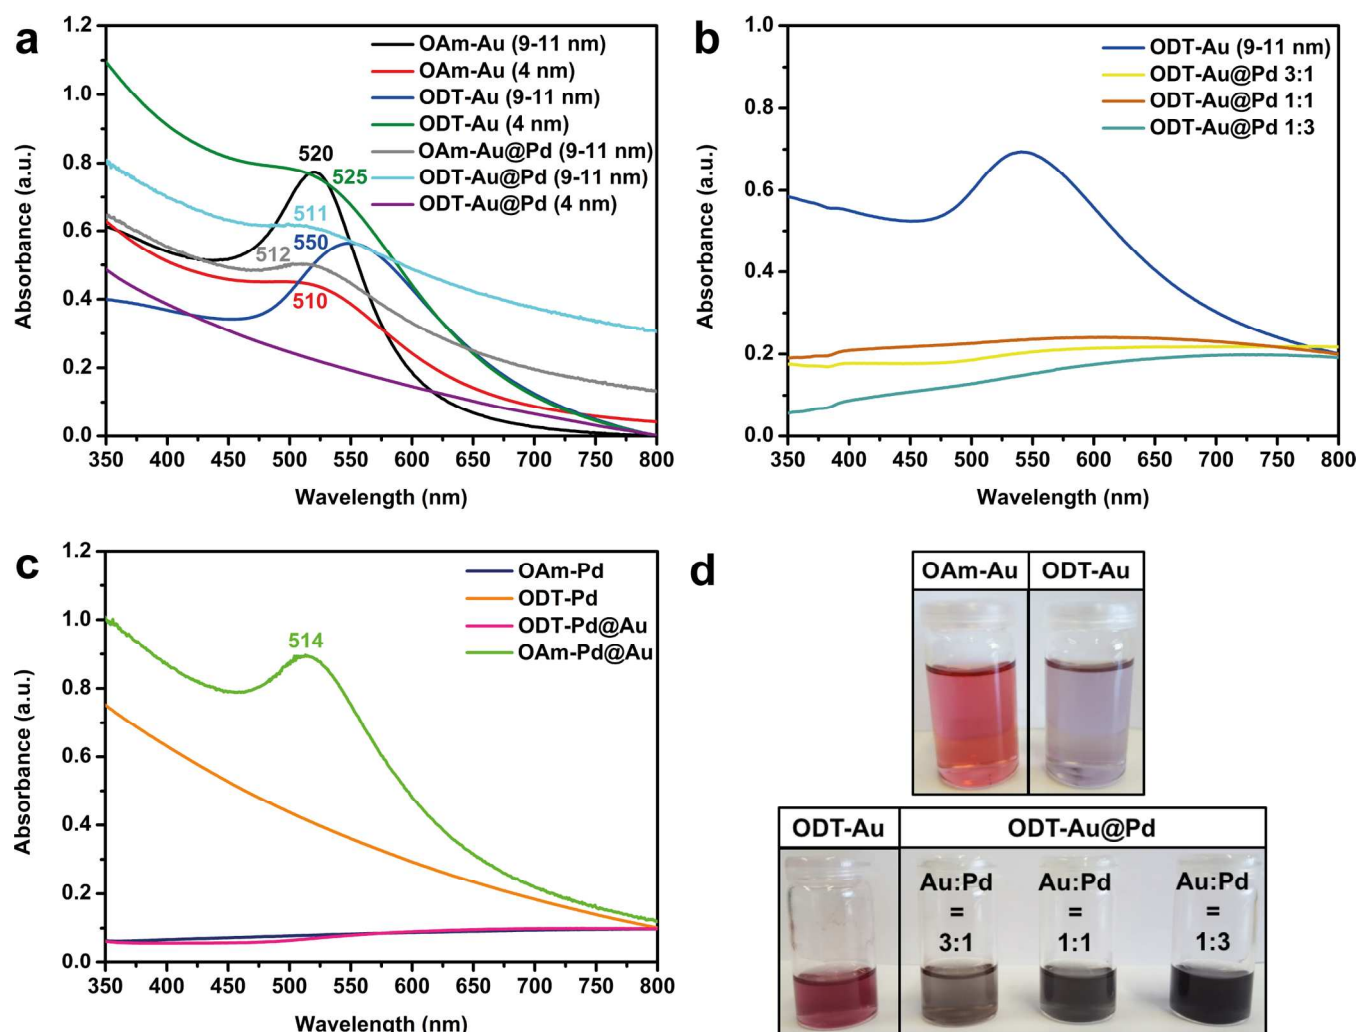

**Figure S11.** UV-vis spectra of (a) OAm-Au, ODT-Au, OAm-Au@Pd and ODT-Au@Pd NPs of 4 nm and 9-11 nm size. (b) UV-vis spectra of ODT-Au@Pd NPs with different Au:Pd ratios. (c) UV-vis spectra of OAm-Pd, ODT-Pd, ODT-Pd@Au and OAm-Pd@Au NPs. (d) Photographs of different NP dispersions of same NP concentration in cyclohexane.
